# Supplementary material for: Surfing the Waves of SARS-CoV-2: Analysis of Viral Genome Variants Using an NGS Survey in Verona, Italy
Source: MDPI journal article supplement (doi:10.3390/microorganisms12050846), 2024-04-24
Supplement: s1 [file s1]

| Year | Month     | Positives in Italy | Positives in Verona |
|------|-----------|--------------------|---------------------|
| 2020 | January   | 3                  | 0                   |
|      | February  | 1,128              | 2                   |
|      | March     | 104,664            | 940                 |
|      | April     | 99,671             | 352                 |
|      | May       | 27,534             | 163                 |
|      | June      | 7,581              | 24                  |
|      | July      | 6,959              | 46                  |
|      | August    | 21,677             | 158                 |
|      | September | 45,647             | 283                 |
|      | October   | 364,569            | 1,347               |
|      | November  | 922,124            | 7,614               |
|      | December  | 505,612            | 12,385              |
| 2021 | January   | 445,866            | 6,566               |
|      | February  | 372,233            | 661                 |
|      | March     | 659,634            | 3,296               |
|      | April     | 437,754            | 3,884               |
|      | May       | 195,168            | 874                 |
|      | June      | 42,088             | 62                  |
|      | July      | 90,119             | 517                 |
|      | August    | 189,963            | 419                 |
|      | September | 132,364            | 248                 |
|      | October   | 99,610             | 180                 |
|      | November  | 256,582            | 868                 |
|      | December  | 1,097,136          | 2,860               |
| 2022 | January   | 4,857,433          | 7,343               |
|      | February  | 1,799,720          | 1,350               |
|      | March     | 1,859,518          | 931                 |
|      | April     | 1,820,846          | 1,224               |
|      | May       | 958,210            | 698                 |
|      | June      | 1,101,701          | 754                 |
|      | July      | 2,516,914          | 1,242               |

|      |           |           |     |
|------|-----------|-----------|-----|
|      | August    | 827,732   | 725 |
|      | September | 599,521   | 466 |
|      | October   | 1,063,745 | 873 |
|      | November  | 729,637   | 892 |
|      | December  | 883,045   | 887 |
| 2023 | January   | 310,084   | 433 |
|      | February  | 93,625    | 172 |
|      | March     | 90,854    | 203 |
|      | April     | 114,256   | 201 |
|      | May       | 57,392    | 128 |
|      | June      | 26,153    | 58  |

**Supplementary Table S1.** Absolute number of positive samples for each month. The table reports the number of positive cases per month from January 2020 to June 2023 in Italy and in Verona.
